# Supplementary material for: Hfq binds directly to the ribosome‐binding site of IS 10 transposase mRNA to inhibit translation
Source: PubMed Central journal article supplement (PMC5006887; doi:10.1111/mmi.12961), 2015-03-11
Supplement: MMI-96-633-s001.pdf [file MMI-96-633-s001.pdf]

## Supplementary Information

Hfq binds directly to the ribosome binding site of *IS10* transposase mRNA to inhibit translation

Michael J. Ellis<sup>1</sup>, Ryan S. Trussler<sup>1</sup> and David B. Haniford<sup>1#</sup>

<sup>1</sup>Department of Biochemistry, University of Western Ontario, London, Ontario, Canada

N6A 5C1

<sup>#</sup>Corresponding author: Email [haniford@uwo.ca](mailto:haniford@uwo.ca); Tel (+1) 519-661-4013

Running title: Hfq directly represses *IS10* transposase translation.

Keywords: Hfq, *IS10*/*Tn10*, ChiX sRNA, Translational regulation, Hfq titration

|           |                                                                                                                     |
|-----------|---------------------------------------------------------------------------------------------------------------------|
| Table S1  | List of bacterial strains and plasmids                                                                              |
| Table S2  | List of oligonucleotides                                                                                            |
| Figure S1 | Hfq expression in an <i>hfq</i> <sup>-</sup> strain of <i>E. coli</i> (DBH299) used for complementation experiments |
| Figure S2 | Mutations to the ribosome-binding site (RBS) or RNA-IN prevent Hfq binding                                          |
| Figure S3 | Toeprint analysis of 30S ribosome binding to <i>lpp</i> or <i>usg</i> mRNA in the presence of Hfq                   |
| Figure S4 | Specificity of Hfq:RNA-IN IP and size distribution of RNA-IN molecules containing a 5' end                          |
| Figure S5 | Hfq determinants for ChiX binding                                                                                   |
| Figure S6 | Impact of mRNA overexpression on transposase expression                                                             |

**Table S1. List of bacterial strains and plasmids**

| Name                  | Description                                                                                                                                                    | Notes                                                                                                                                                                                                              |
|-----------------------|----------------------------------------------------------------------------------------------------------------------------------------------------------------|--------------------------------------------------------------------------------------------------------------------------------------------------------------------------------------------------------------------|
| <b><i>E. coli</i></b> |                                                                                                                                                                |                                                                                                                                                                                                                    |
| DBH12                 | MC4100 <i>hfq-1::ΩCm</i> ; Str <sup>R</sup> Cm <sup>R</sup>                                                                                                    | G. Storz; β-galactosidase assays and source of <i>hfq-1</i> allele for P1 transductions                                                                                                                            |
| DBH13                 | HB101 [F <sup>-</sup> <i>leu</i> <sup>-</sup> <i>pro</i> <sup>-</sup> ]; Str <sup>R</sup>                                                                      | Mating out recipient <sup>1</sup>                                                                                                                                                                                  |
| DBH33                 | NK5830 [ <i>recA</i> <sup>-</sup> <i>arg</i> <sup>-</sup> Δ <i>lacproXIII</i> <i>nal</i> <sup>R</sup> <i>rif</i> <sup>R</sup> /F' <i>lacpro</i> <sup>+</sup> ] | Parent strain for mating out donors <sup>2</sup>                                                                                                                                                                   |
| DBH60                 | C600                                                                                                                                                           | Used for plasmid-λ crosses                                                                                                                                                                                         |
| DBH90                 | DBH33 λRS271 (G8, HH104); Kan <sup>R</sup>                                                                                                                     | Chromosomal IS10-lacZ translation fusion marked with kan <sup>R</sup> ; HH104 mutation increases transposase transcription and G8 mutation increases RNA-OUT expression to maintain antisense control <sup>3</sup> |
| DBH107                | MC4100; Str <sup>R</sup>                                                                                                                                       | β-galactosidase assays                                                                                                                                                                                             |
| DBH287                | DBH107 λRS271 (G8; HH104); Str <sup>R</sup> Kan <sup>R</sup>                                                                                                   | Parent strain                                                                                                                                                                                                      |
| DBH298                | DBH107 λRS271 (HH104); Str <sup>R</sup> Kan <sup>R</sup>                                                                                                       | Chromosomal IS10-lacZ translational fusion marked with Kan <sup>R</sup> , G8 removed by recombineering, no RNA-OUT; β-galactosidase assays ( <i>wt</i> )                                                           |
| DBH299                | DBH298 <i>hfq-1::ΩCm</i> ; Kan <sup>R</sup> Str <sup>R</sup> Cm <sup>R</sup>                                                                                   | β-galactosidase assays ( <i>hfq</i> <sup>-</sup> )                                                                                                                                                                 |
| DBH313                | MRE600 [F <sup>-</sup> Δ <i>rna</i> ]                                                                                                                          | Steitz Lab; Strain for 30S ribosome purification                                                                                                                                                                   |
| DBH331                | DBH33 λDBH504 (HH104); Kan <sup>R</sup>                                                                                                                        | Chromosomal IS10-Kan HH104; mating out donor strain, no RNA-OUT ( <i>wt</i> )                                                                                                                                      |
| DBH337                | DBH331 <i>hfq-1::ΩCm</i> ; Kan <sup>R</sup> Cm <sup>R</sup>                                                                                                    | Mating out donor strain and source of native RNA-IN for RIP experiments, no RNA-OUT ( <i>hfq</i> <sup>-</sup> )                                                                                                    |
| DH5α                  |                                                                                                                                                                | Cloning and plasmid propagation                                                                                                                                                                                    |
| <b>Plasmids</b>       |                                                                                                                                                                |                                                                                                                                                                                                                    |
| pDH858                | pUC119 derived; IS10 <sub>1-242</sub> -lacZ translational fusion; Ap <sup>R</sup>                                                                              | WT IS10-lacZ translational fusion, expresses RNA-OUT                                                                                                                                                               |
| pDH866                | pDH858 + R5                                                                                                                                                    | WT RNA-IN, RNA-OUT destabilized by R5 mutation                                                                                                                                                                     |
| pDH868                | pDH866 + M2                                                                                                                                                    | Mutated Hfq binding site 2 on RNA-IN                                                                                                                                                                               |
| pDH875                | pDH866 + M5                                                                                                                                                    | Mutated Hfq binding site 1 on                                                                                                                                                                                      |

|                |                                                                            |                                                                        |
|----------------|----------------------------------------------------------------------------|------------------------------------------------------------------------|
|                |                                                                            | RNA-IN                                                                 |
| pDH700         | pWKS30-p3-Hfq <sup>WT</sup> ; Ap <sup>R</sup>                              | Parent plasmid; expression vector for Hfq <sup>WT</sup> <sup>4</sup>   |
| pDH701         | pDH700-Hfq <sup>K56A</sup>                                                 | Parent plasmid; expression vector for Hfq <sup>K56A</sup> <sup>4</sup> |
| pDH713         | pDH700-Hfq <sup>Y25A</sup>                                                 | Parent plasmid; expression vector for Hfq <sup>Y25A</sup> <sup>4</sup> |
| pDH874         | pDH700-Hfq <sup>R17A</sup>                                                 | Parent plasmid; expression vector for Hfq <sup>R17A</sup>              |
| pDH900         | pACYC184 with Scal/XmnI fragment removed; Tet <sup>R</sup> Cm <sup>S</sup> | Vector control for Hfq complementation experiments                     |
| pDH904         | pDH900-p3-Hfq <sup>WT</sup>                                                | Expression vector for Hfq <sup>WT</sup>                                |
| pDH905         | pDH900-p3-Hfq <sup>Y25A</sup>                                              | Expression vector for Hfq <sup>Y25A</sup>                              |
| pDH906         | pDH900-p3-Hfq <sup>K56A</sup>                                              | Expression vector for Hfq <sup>K56A</sup>                              |
| pDH907         | pDH900-p3-Hfq <sup>R17A</sup>                                              | Expression vector for Hfq <sup>R17A</sup>                              |
| pDH909         | pDH900-p3-Hfq <sup>WT</sup> -3xFLAG                                        | Expression vector for Hfq <sup>WT</sup> -3xFLAG                        |
| pDH763         | pBR-pLlacO; Ap <sup>R</sup>                                                | Vector control for sRNA expression; S. Gottesman <sup>5</sup>          |
| pDH764         | pBR-pLlacO-sgrS; Ap <sup>R</sup> Tet <sup>R</sup>                          | SgrS expression; S. Gottesman <sup>5</sup>                             |
| pDH765         | pBR-pLlacO-chiX; Ap <sup>R</sup> Tet <sup>R</sup>                          | ChiX expression; S. Gottesman <sup>5</sup>                             |
| pDH766         | pBR-pLlacO-RybB; Ap <sup>R</sup> Tet <sup>R</sup>                          | RybB expression; S. Gottesman <sup>5</sup>                             |
| pDH767         | pBR-pLlacO-FnrS; Ap <sup>R</sup> Tet <sup>R</sup>                          | FnrS expression; S. Gottesman <sup>5</sup>                             |
| pDH768         | pBR-pLlacO-MicC; Ap <sup>R</sup> Tet <sup>R</sup>                          | MicC expression; S. Gottesman <sup>5</sup>                             |
| pDH769         | pBR-pLlacO-RydC; Ap <sup>R</sup> Tet <sup>R</sup>                          | RydC expression; S. Gottesman <sup>5</sup>                             |
| pDH770         | pBR-pLlacO-MgrR; Ap <sup>R</sup> Tet <sup>R</sup>                          | MgrR expression; S. Gottesman <sup>5</sup>                             |
| pDH771         | pBR-pLlacO-RprA; Ap <sup>R</sup> Tet <sup>R</sup>                          | RprA expression; S. Gottesman <sup>5</sup>                             |
| pDH772         | pBR-pLlacO-RyeB; Ap <sup>R</sup> Tet <sup>R</sup>                          | RyeB expression; S. Gottesman <sup>5</sup>                             |
| pDH773         | pBR-pLlacO-CyaR; Ap <sup>R</sup> Tet <sup>R</sup>                          | CyaR expression; S. Gottesman <sup>5</sup>                             |
| pDH774         | pBR-pLlacO-MicF; Ap <sup>R</sup> Tet <sup>R</sup>                          | MicF expression; S. Gottesman <sup>5</sup>                             |
| pDH775         | pBR-pLlacO-GlmY; Ap <sup>R</sup> Tet <sup>R</sup>                          | GlmY expression; S. Gottesman <sup>5</sup>                             |
| pDH776         | pBR-pLlacO-MicA; Ap <sup>R</sup> Tet <sup>R</sup>                          | MicA expression; S. Gottesman <sup>5</sup>                             |
| pDH777         | pBR-pLlacO-GcvB; Ap <sup>R</sup> Tet <sup>R</sup>                          | GcvB expression; S. Gottesman <sup>5</sup>                             |
| pDH920         | pBR-pLlacO-sodB <sub>-56 to +244</sub> ; Ap <sup>R</sup> Tet <sup>R</sup>  | <i>sodB</i> expression                                                 |
| pDH921         | pBR-pLlacO-ptsG <sub>-102 to +230</sub> ; Ap <sup>R</sup> Tet <sup>R</sup> | <i>ptsG</i> expression                                                 |
| pDH922         | pBR-pLlacO-maeA <sub>.73 to +241</sub> ; Ap <sup>R</sup> Tet <sup>R</sup>  | <i>maeA</i> expression                                                 |
|                |                                                                            |                                                                        |
| <b>λ phage</b> |                                                                            |                                                                        |
| λRS271         | Source of IS10-Kan HH104 G8                                                | R. Simons <sup>3</sup>                                                 |
| λNK1039        | Encodes <i>his</i> operon                                                  | N. Kleckner; plasmid-λ crosses <sup>6</sup>                            |
| λDBH504        | λNK1039 with IS10-Kan HH104                                                | Product of recombination between λNK1039 and pNK1223 <sup>7</sup>      |

## References

1. Bolivar, F. & Backman, K. (1979). Plasmids of Escherichia coli as cloning vectors. *Methods Enzymol* **68**, 247-267.
2. Foster, T. J., Davis, M. A., Roberts, D. E., Takeshita, K. & Kleckner, N. (1981). Genetic organization of transposon Tn10. *Cell* **23**, 201-213.
3. Case, C. C., Roels, S. M., Jensen, P. D., Lee, J., Kleckner, N. & Simons, R. W. (1989). The unusual stability of the IS10 anti-sense RNA is critical for its function and is determined by the structure of its stem-domain. *EMBO J* **8**, 4297-305.
4. Ross, J. A., Wardle, S. J. & Haniford, D. B. (2010). Tn10/IS10 transposition is downregulated at the level of transposase expression by the RNA-binding protein Hfq. *Mol Microbiol* **78**, 607-21.
5. Mandin, P. & Gottesman, S. (2010). Integrating anaerobic/aerobic sensing and the general stress response through the ArcZ small RNA. *EMBO J* **29**, 3094-107.
6. Haniford, D. B., Chelouche, A. R. & Kleckner, N. (1989). A specific class of IS10 transposase mutants are blocked for target site interactions and promote formation of an excised transposon fragment. *Cell* **59**, 385-94.
7. Bender, J., Kuo, J. & Kleckner, N. (1991). Genetic evidence against intramolecular rejoining of the donor DNA molecule following IS10 transposition. *Genetics* **128**, 687-94.

**Table S2. List of oligonucleotides used in this study**

| Name   | Sequence (5' → 3')                                                                                    | Use                                                                                            |
|--------|-------------------------------------------------------------------------------------------------------|------------------------------------------------------------------------------------------------|
| oDH502 | GGATCGGAATTCCGATCTTCCCTGATGA<br>ATCCCCTAATGATTTTGG                                                    | Fwd primer for making pDH858                                                                   |
| oDH503 | CCCCCAAGCTTGGCGCCAAGTTCGGTA<br>AGAGTGAGAGTTTTACAGTC                                                   | Rev primer for making pDH858                                                                   |
| oDH505 | GGATCGGAATTCCGATCTTCC                                                                                 | IS10R Fwd primer used for introducing mutations into pDH866                                    |
| oDH13  | CCAGTCACGACGTTGTAAAAC                                                                                 | LacZ reverse primer used for introducing mutations into pDH866                                 |
| oDH506 | CCAGTCACGACGTTGTAAAAC                                                                                 | Mutagenic primers for introducing R5 mutation into pDH858                                      |
| oDH507 | GACAAGATATGTATCCACC                                                                                   |                                                                                                |
| oDH498 | CTCGACACCCACACGACTCTC                                                                                 | Mutagenic primers for introducing M2 mutation into pDH866                                      |
| oDH499 | GAGAGTCGTGTGGGGTGTCTGAG                                                                               |                                                                                                |
| oDH508 | GTCAGTCTGCGGATCACAAGATG                                                                               | Mutagenic primers for introducing M5 mutation into pDH866                                      |
| oDH509 | CATCTTGTGATCCGCAGACTGAC                                                                               |                                                                                                |
| oDH515 | TAATACGACTCACTATAGGCGAAAAAT<br>CAATAACAG                                                              | Fwd primer for making IN-160 an IN <sup>M2</sup> -160 ITR templates; contains T7 core promoter |
| oDH199 | CAAGTTCGGTAAGAGTGAGAG                                                                                 | Rev primer for making IN-160 ITR templates; Rev primer for PCR amplification of RNA-IN cDNA    |
| oDH510 | TAATACGACTCACTATAGGCGAAAAGT<br>CAGTCTG                                                                | Fwd primer for making IN <sup>M5</sup> -160 ITR template; contains T7 core promoter            |
| oDH511 | TGTTGAGTCTCGTTTTAAGTGTA                                                                               | Primer for making RNA-IN-100 cDNA (primer extension and toeprinting)                           |
| oDH513 | UUUUUUU                                                                                               | RNA oligo; proximal site competitor                                                            |
| oDH514 | AAAAAAAAAAAAAAAAAAAAA                                                                                 | RNA oligo; distal site specific competitor                                                     |
| oDH480 | TGTAATACGACTCACTATAGGGCTACAT<br>GGAGATTAAC                                                            | Fwd primer for making lpp ITR template; contains T7 promoter sequence                          |
| oDH482 | CACGTCGTTGCTCAGCT                                                                                     | Reverse primer for making lpp ITR template; also used for lpp primer extension and toeprinting |
| oDH184 | NNTCTAGANNCAGGTTGTTGGTGCTATC                                                                          | Fwd primer for Hfq gene                                                                        |
| oDH479 | TTACTTGTCGTCATCGTCTTTGTAGTCCT<br>TGTCGTCATCGTCTTTGTAGTCCTTGTCG<br>TCATCGTCTTTGTAGTCTTCGGTTTCTTC<br>GC | Rev primer for adding C-terminal 3xFLAG tag                                                    |
| oDH486 | 5'[Phos]GCUGAUGGCGAUGAAUGAACAC                                                                        | RNA adapter; ligated to total RNA                                                              |

|        |                                                   |                                                                                                              |
|--------|---------------------------------------------------|--------------------------------------------------------------------------------------------------------------|
|        | UGCGUUUGCUGGCCUUUGAUGAAA                          | for reverse transcription                                                                                    |
| oDH483 | GCGAAAAATCAATAATCAGAC                             | Fwd primer for RT-PCR of RNA-IN                                                                              |
| oDH517 | GCGAAAAGTCAGTCTGAGAC                              | Fwd primer for RT-PCR of RNA-IN <sup>M5</sup>                                                                |
| oDH204 | CGTGTTGTGAAATGTTGGGTAAAGT                         | Primer pair for RT-PCR of 16S rRNA (nt 1071-1425)                                                            |
| oDH205 | AACCCACTCCCATGGTGTGACGGGC                         |                                                                                                              |
| oDH518 | GCCAGCTGGCGAAAGG                                  | Primer pair for amplifying MCS of pWKS30 derived plasmids; used for introducing R17A mutation into pDH700    |
| oDH519 | TAATGCAGCTGGCACGACAGG                             |                                                                                                              |
| oDH520 | GCACTGCGTGCGGAACGTGTTCC                           | Mutagenic primers for introducing R17A mutation into pDH700                                                  |
| oDH521 | GGAACACGTTCCGCACGCAGTGC                           |                                                                                                              |
| oDH352 | TTTCATCAAAGCCAGCAAACGC                            | RNA adapter specific primer used for cDNA synthesis                                                          |
| oDH353 | CAAACGCAGTGTTTCATTCATCGCC                         | RNA adapter specific nested primer used for PCR of total RNA-IN cDNA                                         |
| oDH234 | TAATACGACTCACTATAGGCCTGGCAGT<br>TCCCTACTCTCG      | Fwd primer for making antisense 5S rRNA (rrfA) ITR template for Northern blot; contains T7 promoter sequence |
| oDH235 | CGGCAGTAGCGCGGTG                                  | Reverse primer for above                                                                                     |
| oDH308 | TAATACGACTCACTATAGGGAAAAAAA<br>TGGCCAATATCGCTATTG | Fwd primer for making antisense ChiX ITR template for Northern blot; contains T7 promoter sequence           |
| oDH309 | ACACCGTCGCTTAAAGTGACG                             | Reverse primer for above                                                                                     |
| oDH298 | CGGGTGATTTTACACCAATAC                             | Oligonucleotide for SgrS Northern blot                                                                       |
| oDH528 | TAATACGACTATAGACACCGTCGCTTAA<br>AGTGAC            | Fwd primer for making ChiX ITR template; contains T7 promoter sequence                                       |
| oDH529 | AAAAAAATGGCCAATATCGCTATTGGC<br>CCG                | Reverse primer for above                                                                                     |
| oDH554 | TAATACGACTCACTATAGGCTCTGCTGT<br>AACATTGGCAG       | Fwd primer for making usg ITR template; contains T7 promoter sequence                                        |
| oDH555 | CCCACAGCGCCAGTTGC                                 | Reverse primer for above; also used for toeprinting                                                          |
| oDH558 | AATACTGACGTCATACGCACAATAAGG<br>CTATTG             | Primer pair for amplifying sodB for overexpression in pDH920                                                 |
| oDH559 | AATACTGAATTCCAGGCAGTTCCAGTAG<br>AAAG              |                                                                                                              |
| oDH560 | AATACTGACGTCATAAATAAAGGGCGC                       | Primer pair for amplifying ptsG for                                                                          |

|        |                                      |                                 |
|--------|--------------------------------------|---------------------------------|
|        | TTAG                                 | overexpression in pDH921        |
| oDH561 | AATACTGAATTCACGCCATCGTTATTGG         |                                 |
| oDH562 | AATATGACGTCGCCGACGCCCTGGCG           | Primer pair for amplifying maeA |
| oDH563 | AATACTGAATTCGGATGTTACGCAGGTA<br>GATG | for overexpression in pDH922    |



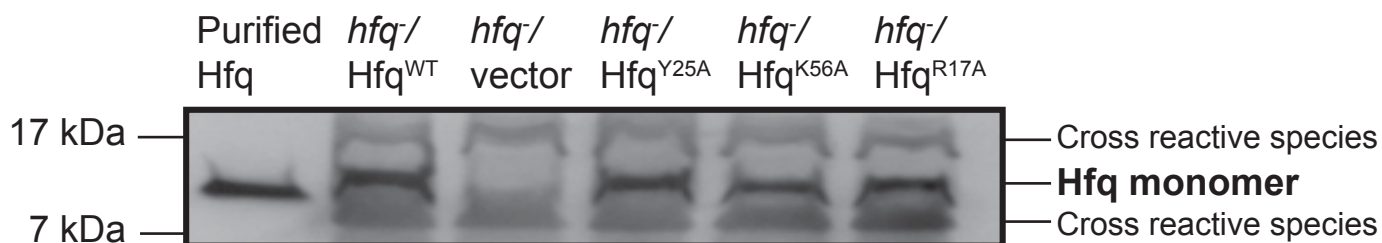

**Figure S1.** Hfq expression in an *hfq*<sup>-</sup> strain of *E. coli* (DBH299) used for complementation experiments. Prior to measuring  $\beta$ -galactosidase activity of IS10-*lacZ* (Fig. 2a), an equivalent number of cells (0.4 OD<sub>600</sub>) were pelleted and frozen at -80°C. Pellets were resuspended in SDS load-mix (2% SDS, 10% glycerol, 50 mM Tris-HCl pH 6.8, 0.25% bromophenol blue and 0.8 M  $\beta$ -mercaptoethanol) and boiled for 5 minutes. Samples were separated on a 14% SDS-PAGE gel and then transferred to a PVDF membrane (Roche). Hfq was detected by Western Blot using a polyclonal rabbit anti-Hfq antibody and a Pierce ECL 2 Western Blotting kit (Thermo Scientific). Purified Hfq (0.6 pmol) was loaded as a positive control.

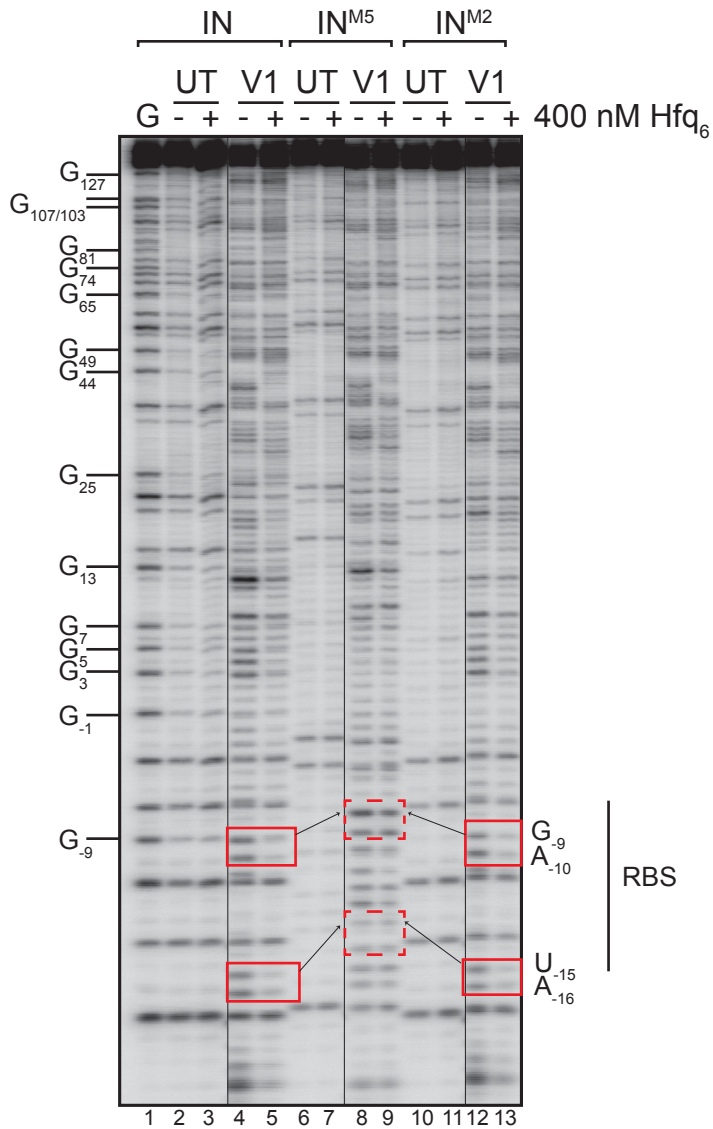

**Figure S2.** Mutations to the ribosome-binding site (RBS) of RNA-IN prevent Hfq binding.  $5^{32}\text{P}$ -labeled RNA-IN-160 (150 nM) was incubated  $-/+$  400 nM Hfq (hexamers) before treatment with RNase V1. Untreated controls and a RNase T1 sequencing ladder (lane 1) are shown. Nucleotide numbering is relative to the translational start. Four positions that are strongly protected from cleavage on wild-type RNA-IN (lanes 4-5) and  $\text{IN}^{\text{M}2}$  (lanes 12-13) are indicated with red boxes. The corresponding positions that are not protected on  $\text{IN}^{\text{M}5}$  are indicated with dashed red boxes. Note that the *in vitro* transcript for  $\text{IN}^{\text{M}5}$  contains an extra 5'nt, resulting in a 1nt difference in the migration of RNA fragments (indicated by black arrows). Note that certain lanes from this gel were removed for clarity (indicated by black vertical lines).



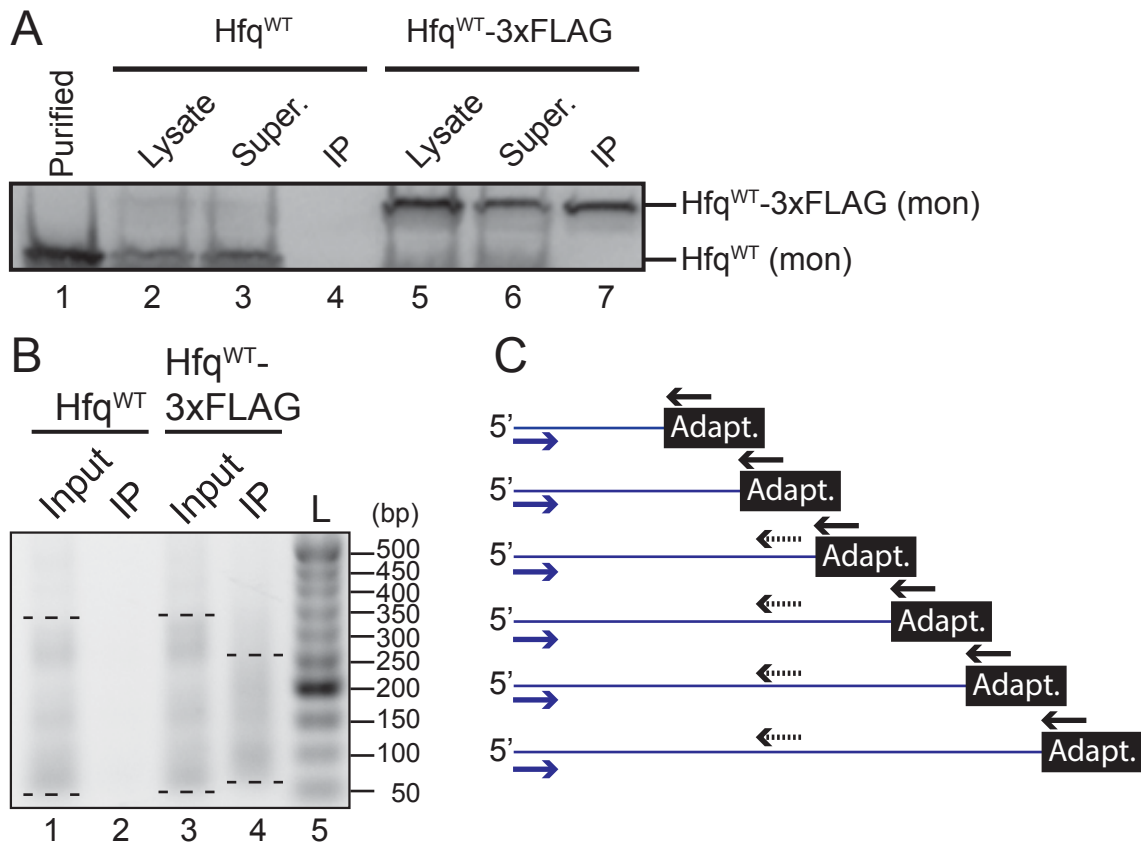

**Figure S4.** Specificity of Hfq:RNA-IN IP and size distribution of RNA-IN molecules containing a 5' end. (A) Hfq western blot of fractions from Hfq<sup>WT</sup> and Hfq<sup>WT</sup>-3xFLAG immunoprecipitations. Aliquots of total cellular lysate (lanes 2 and 3), supernatant from IP reactions (lanes 3 and 6), or the ANTI-FLAG<sup>®</sup> M2 Magnetic Beads following washes (lanes 4 and 7) were subject to western blot as described in Figure S1. Purified Hfq (0.15 pmol) was loaded as a positive control (lane 1). The tagged and untagged Hfq monomers are indicated. (B) cDNA from total RNA (lanes 1 and 3) or IP reactions (lanes 2 and 5) was amplified by 24 cycles of PCR using an RNA-IN specific forward primer and a nested RNA Adapter specific reverse primer. PCR products were then resolved on a 2% Agarose/TBE gel and stained with EtBr. A DNA ladder (lane 5) was used to determine the size distribution of PCR products which is indicated with dashed horizontal lines. (C) Schematic of RT-PCR used for Hfq IP. Total RNA from the RIP was ligated to an RNA adapter (black box). An adapter specific primer was for cDNA synthesis, yielding a mixed population of RNA species. The size distribution of RNA-IN molecules with an intact 5' end (B) was determined by amplifying PCR with an RNA-IN specific forward primer (blue arrow) that anneals to the extreme 5' end and a nested adapter specific primer (black arrow). PCR shown in Fig. 7 used an RNA-IN specific forward primer (blue) and an RNA-IN specific reverse primer (dashed black arrow) to amplify the first 160-nt of RNA-IN. Accordingly, the RNA-IN signal shown in Fig. 7 originates from RNA-IN molecules containing at least the first 160-nt of RNA-IN.

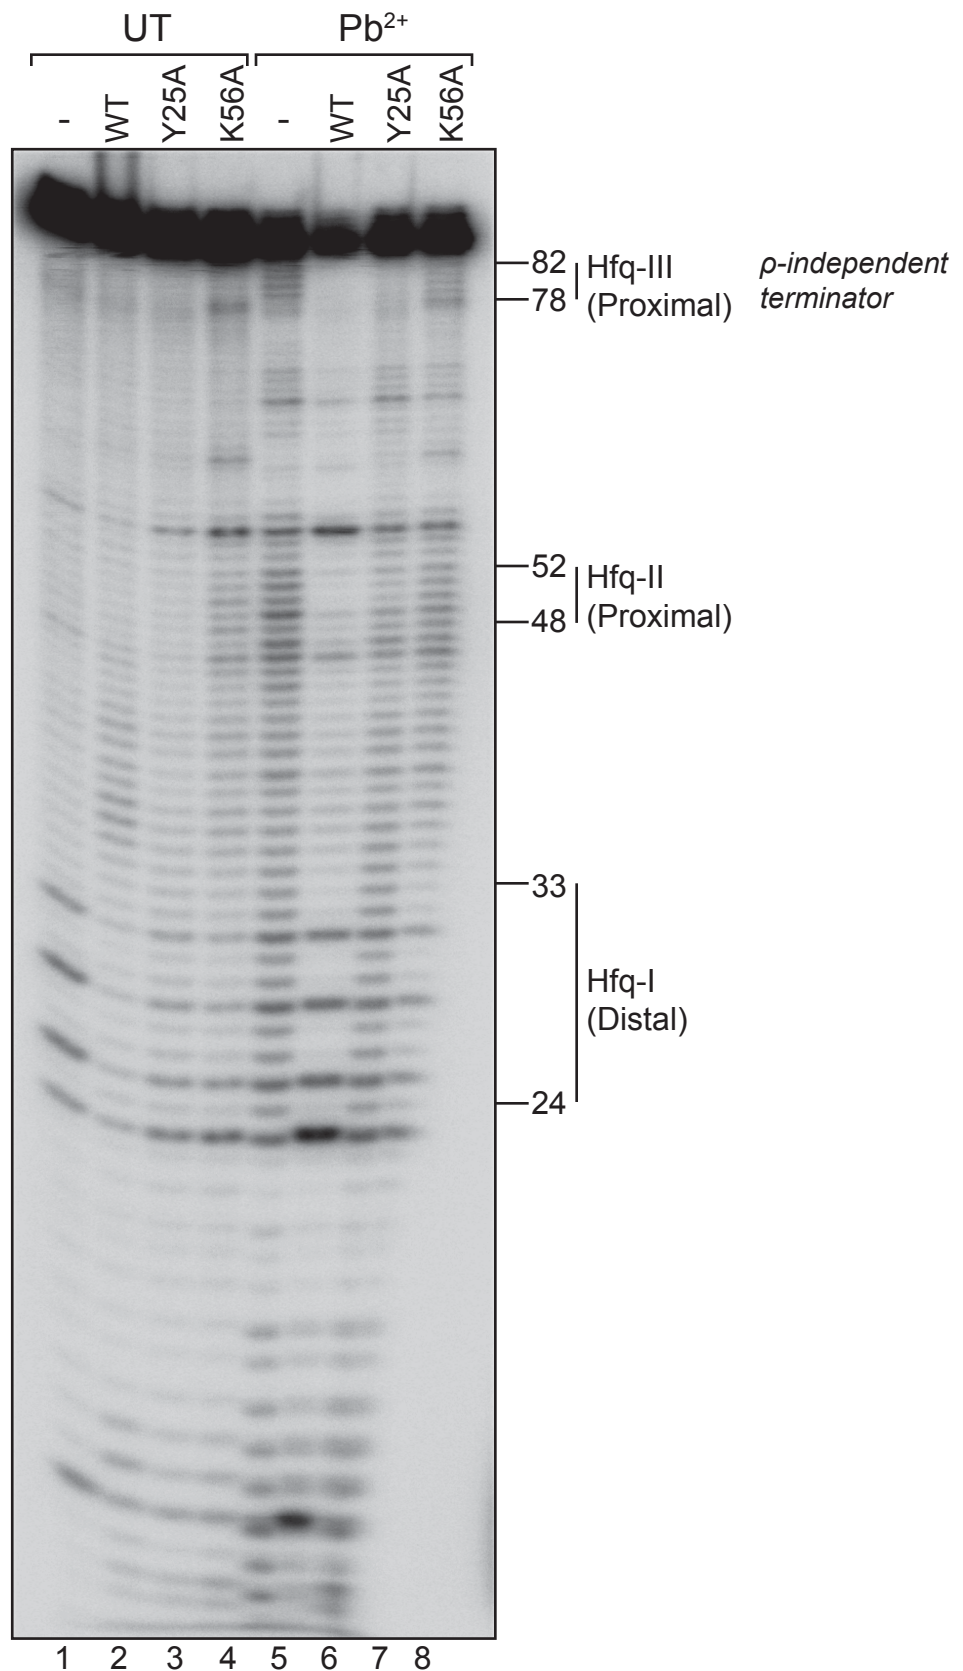

**Figure S5.** Hfq determinants for ChiX binding. 5'<sup>32</sup>P-labeled ChiX (140 nM) was incubated with WT and mutant variants of his-tagged Hfq (380 nM) before limited cleavage with Pb<sup>2+</sup> (lanes 5-8). Untreated controls are shown (lanes 1-4). The location of the two Hfq-binding sites identified in Fig. 9C (Hfq-I and Hfq-II) are highlighted along with a third site (Hfq-III) that corresponds to the polyU tail after the  $\rho$ -independent transcriptional terminator. Sites are defined as interacting with the distal surface if they are protected by Hfq<sup>WT</sup> and Hfq<sup>K56A</sup> but not Hfq<sup>Y25A</sup>. Likewise, sites that show reduced protection with Hfq<sup>K56A</sup> compared to Hfq<sup>WT</sup>/Hfq<sup>Y25A</sup> are defined as interacting with the proximal surface of Hfq.

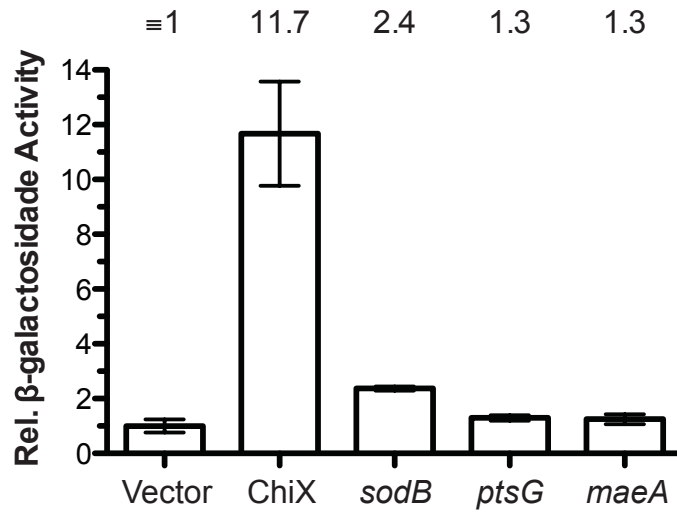

**Figure S6.** Impact of mRNA overexpression on transposase expression. *hfq*<sup>+</sup> cells containing the chromosomal IS10<sub>1-337</sub>-*lacZ* translational fusion (DBH298) were transformed with a plasmid expressing ChiX (pDH765), *sodB*<sub>-56 to +244</sub> (pDH920), *ptsG*<sub>-102 to +230</sub> (pDH921), *maeA*<sub>-73 to 241</sub> (pDH922) or a vector control (pDH763). Transformants were grown to mid-exponential phase in LB media and β-galactosidase activity was measured by the Miller assay. Error bars show the standard error on the mean for two independent experiments (n=6) and the relative expression is shown above the graph, where transposase-*lacZ* expression in the presence of vector was set to 1.
